# Supplementary material for: Comparison of Carboplatin With Cisplatin in Small Cell Lung Cancer in US Veterans
Source: PubMed Central journal article supplement (PMC9585434; doi:10.1001/jamanetworkopen.2022.37699), 2022-10-20
Supplement: jamanetwopen-e2237699-s001.pdf [file jamanetwopen-e2237699-s001.pdf]

## Supplemental Online Content

Azar I, Yazdanpanah O, Jang H, et al. Comparison of carboplatin with cisplatin in small cell lung cancer in US veterans. *JAMA Netw Open*. 2022;5(10):e2237699.  
doi:10.1001/jamanetworkopen.2022.37699

**eTable 1.** Baseline Characteristics of ES-SCLC

**eTable 2.** Baseline Characteristics of LS-SCLC

This supplemental material has been provided by the authors to give readers additional information about their work.

**eTable 1.** Baseline Characteristics of ES-SCLC

|                               | All (n=2652)* | Carboplatin<br>(n=2032) | Cisplatin<br>(n=660) | P value# |
|-------------------------------|---------------|-------------------------|----------------------|----------|
| <b>Gender – no. (%)</b>       |               |                         |                      | 0.008    |
| Female                        | 69 (2.6%)     | 45 (2.2%)               | 28 (4.2%)            |          |
| Male                          | 2583 (97.4%)  | 1987 (97.8%)            | 632 (95.8%)          |          |
| <b>Age – no. (%)</b>          |               |                         |                      | <0.001   |
| 40-49 years                   | 13 (0.5%)     | 3 (0.1%)                | 10 (1.5%)            |          |
| 50-59 years                   | 371 (14.0%)   | 238 (11.7%)             | 142 (21.5%)          |          |
| 60-69 years                   | 1327 (50.0%)  | 981 (48.3%)             | 368 (55.8%)          |          |
| ≥70 years                     | 941 (35.5%)   | 810 (39.9%)             | 140 (21.2%)          |          |
| <b>Race – no. (%)</b>         |               |                         |                      |          |
| African American              | 239 (9.0%)    | 183 (9.0%)              | 62 (9.4%)            | 0.82     |
| White                         | 2187 (82.5%)  | 1684 (82.9%)            | 534 (80.9%)          |          |
| Other‡                        | 49 (1.8%)     | 38 (1.9%)               | 11 (1.7%)            |          |
| Declined to<br>Answer/Unknown | 177 (6.7%)    | 127 (6.2%)              | 53 (8%)              |          |
| <b>Ethnicity – no. (%)</b>    |               |                         |                      | 0.22     |
| Hispanic or Latino            | 39 (1.5%)     | 26 (1.3%)               | 13 (2.0%)            |          |
| Not Hispanic or Latino        | 2489 (93.9%)  | 1919 (94.4%)            | 609 (92.3%)          |          |

|                                     |              |             |             |      |
|-------------------------------------|--------------|-------------|-------------|------|
| Declined to Answer/Unknown          | 124 (4.7%)   | 87 (4.3%)   | 38 (5.8%)   |      |
| <b>Performance status – no. (%)</b> |              |             |             | 0.46 |
| ECOG 0                              | 285 (10.7%)  | 212 (10.4%) | 76 (11.5%)  |      |
| ECOG 1                              | 709 (26.7%)  | 560 (27.6%) | 160 (24.2%) |      |
| ECOG 2                              | 373 (14.1%)  | 293 (14.4%) | 87 (13.2%)  |      |
| ECOG 3                              | 150 (5.7%)   | 127 (6.2%)  | 28 (4.2%)   |      |
| ECOG 4                              | 11 (0.4%)    | 9 (0.4%)    | 2 (0.3%)    |      |
| ECOG 5                              | 4 (0.2%)     | 3 (0.1%)    | 1 (0.2%)    |      |
| Unknown                             | 1120 (42.2%) | 828 (40.7%) | 306 (46.4%) |      |

\* 40 patients received both carboplatin and cisplatin;

# Fisher's exact test

¥ Asian, American Indian or Alaskan Native, Native Hawaiian or other Pacific Islander, and multiple race

**eTable 2.** Baseline Characteristics of LS-SCLC

|                            | All (n=1756)* | Carboplatin<br>(n=801) | Cisplatin<br>(n=1018) | P value <sup>#</sup> |
|----------------------------|---------------|------------------------|-----------------------|----------------------|
| <b>Gender – no. (%)</b>    |               |                        |                       | 0.83                 |
| Female                     | 87 (5.0%)     | 39 (4.9%)              | 52 (5.1%)             |                      |
| Male                       | 1669 (95.0%)  | 762 (95.1%)            | 966 (94.9%)           |                      |
| <b>Age – no. (%)</b>       |               |                        |                       | <0.001               |
| 30-39 years                | 2 (0.1%)      | 0 (0%)                 | 2 (0.2%)              |                      |
| 40-49 years                | 24 (1.4%)     | 7 (0.9%)               | 19 (1.9%)             |                      |
| 50-59 years                | 260 (14.8%)   | 85 (10.6%)             | 188 (18.5%)           |                      |
| 60-69 years                | 935 (53.2%)   | 380 (47.4%)            | 589 (57.9%)           |                      |
| ≥70 years                  | 535 (30.5%)   | 329 (41.1%)            | 220 (21.6%)           |                      |
| <b>Race – no. (%)</b>      |               |                        |                       | 0.42                 |
| African American           | 212 (12.1%)   | 95 (11.9%)             | 125 (12.3%)           |                      |
| White                      | 1402 (79.8%)  | 651 (81.3%)            | 800 (78.6%)           |                      |
| Other <sup>‡</sup>         | 28 (1.6%)     | 10 (1.2%)              | 18 (1.8%)             |                      |
| Declined to Answer/Unknown | 114 (6.5%)    | 45 (5.6%)              | 75 (7.4%)             |                      |
| <b>Ethnicity – no. (%)</b> |               |                        |                       | 0.16                 |
| Hispanic or Latino         | 30 (1.7%)     | 8 (1.0%)               | 22 (2.2%)             |                      |
| Not Hispanic or Latino     | 1653 (94.1%)  | 759 (94.8%)            | 953 (93.6%)           |                      |
| Declined to Answer/Unknown | 73 (4.2%)     | 34 (4.2%)              | 43 (4.2%)             |                      |

|                              |             |             |             |       |
|------------------------------|-------------|-------------|-------------|-------|
| Performance status – no. (%) |             |             |             | 0.002 |
| ECOG 0                       | 344 (19.6%) | 150 (18.7%) | 207 (20.3%) |       |
| ECOG 1                       | 559 (31.8%) | 258 (32.2%) | 323 (31.7%) |       |
| ECOG 2                       | 146 (8.3%)  | 82 (10.2%)  | 70 (6.9%)   |       |
| ECOG 3                       | 38 (2.2%)   | 27 (3.4%)   | 12 (1.2%)   |       |
| ECOG 4                       | 3 (0.2%)    | 2 (0.2%)    | 1 (0.1%)    |       |
| Unknown                      | 666 (37.9%) | 282 (35.2%) | 405 (39.8%) |       |

\* 63 patients received both carboplatin and cisplatin

# Fisher’s exact test

‡Asian, American Indian or Alaskan Native, and Native Hawaiian or other Pacific Islander
